# Supplementary material for: Transcription factor Emx2 controls stereociliary bundle orientation of sensory hair cells
Source: eLife. 2017 Mar 7;6:e23661. doi: 10.7554/eLife.23661 (PMC5388538; doi:10.7554/eLife.23661)
Supplement: Figure 2—source data 1. — DOI: http://dx.doi.org/10.7554/eLife.23661.005 [file elife-23661-fig2-data1.xlsx]

## Sheet: Area
			Sensory area quantifications for Emx2 mutant maculae
			Utricle				Saccule
			Genotype	Sample #	Area ( um2)		Genotype	Sample #	Area ( um2)
			Control	1	121656		Control	1	132512
				2	101863			2	145303
				3	109368			3	165168
				AVG	110962			AVG	147661
				SEM	5769.13			SEM	9500.66
			Emx2Cre/-	1	115271		Emx2Cre/-	1	121576
				2	137239			2	127953
				3	104492			3	111240
				AVG	119001			AVG	120256
				SEM	9635.41			SEM	4869.63
				t-test, P value	0.51369			t-test, P value	0.0621792
			Emx2-/-	1	184017
				2	134434
				3	127840
				AVG	148764
				SEM	17729.1
				t-test, P value	0.228962
