# Supplementary material for: Transcription factor Emx2 controls stereociliary bundle orientation of sensory hair cells
Source: eLife. 2017 Mar 7;6:e23661. doi: 10.7554/eLife.23661 (PMC5388538; doi:10.7554/eLife.23661)
Supplement: Figure 2—source data 2. — DOI: http://dx.doi.org/10.7554/eLife.23661.006 [file elife-23661-fig2-data2.xlsx]

## Sheet: HC#
	Total hair cell number in utricles of loss- and gain-of-function Emx2 mutants
		Genotype	Sample #	HC #
		Control	1	1438
			2	1211
			3	1359
			AVG	1336
			SEM	66.5307
		Emx2 cre/-	1	1199
			2	1345
			3	1516
			AVG	1353.33
			SEM	91.6048
			t-test, P value	0.885732
		GOF - HC	1	1211
			2	1305
			3	1403
			AVG	1306.33
			SEM	55.4296
			t-test, P value	0.683356
