# Supplementary material for: Transcription factor Emx2 controls stereociliary bundle orientation of sensory hair cells
Source: eLife. 2017 Mar 7;6:e23661. doi: 10.7554/eLife.23661 (PMC5388538; doi:10.7554/eLife.23661)
Supplement: Figure 3—source data 1. — DOI: http://dx.doi.org/10.7554/eLife.23661.010 [file elife-23661-fig3-data1.xlsx]

## Sheet: Sheet1
	Timing of terminal mitosis in utricular hair cells of Emx2 mutants
	Emx2 Heterozygotes											Emx2 Knockouts
		Lateral Extrastiola			Striola			Medial Extrastriola					Lateral Extrastiola			Striola			Medial Extrastriola
EdU injection age/Harvest age	Sample#	Total HC#	EdU +ve HCs	% EdU+ HC/total HC	Total HC#	EdU +ve HCs	% EdU+ HC/total HC	Total HC#	EdU +ve HCs	% EdU+ HC/total HC		Sample#	Total HC#	EdU +ve HCs	% EdU+ HC/total HC	Total HC#	EdU +ve HCs	% EdU+ HC/total HC	Total HC#	EdU +ve HCs	% EdU+ HC/total HC
E11.5/E18.5	1	595	48	8.06723	380	140	36.8421	530	145	27.3585		1	535	43	8.03738	405	130	32.0988	370	94	25.4054
	2	524	53	10.1145	274	124	45.2555	407	147	36.1179		2	404	64	15.8416	425	168	39.5294	486	216	44.4444
	3	467	69	14.7752	260	111	42.6923	501	250	49.9002		3	477	39	8.1761	365	104	28.4932	515	111	21.5534
	AVG	528.667	56.6667	10.9856	304.667	125	41.5966	479.333	180.667	37.7922		AVG	472	48.6667	10.685	398.333	134	33.3738	457	140.333	30.4677
	SEM			1.9848			2.48975			6.56086		SEM			2.57859			3.24905			7.07626
	t-test, P value		Het vs KO	0.930837			0.114949			0.490104
E12.5/E18.5	1	439	78	17.7677	175	72	41.1429	419	132	31.5036		1	488	67	13.7295	244	52	21.3115	489	103	21.0634
	2	552	81	14.6739	247	55	22.2672	472	92	19.4915		2	343	65	18.9504	195	58	29.7436	523	158	30.2103
	3	478	77	16.1088	431	97	22.5058	558	141	25.2688		3	367	66	17.9837	372	102	27.4194	546	140	25.641
	AVG	489.667	78.6667	16.1835	284.333	74.6667	28.6386	483	121.667	25.4213		AVG	399.333	66	16.8879	270.333	70.6667	26.1581	519.333	133.667	25.6382
	SEM			0.893866			6.2525			3.46842		SEM			1.60365			2.5145			2.64049
	t-test, P value		Het vs KO	0.177227			0.898078			0.669535
E13.5/E18.5	1	504	131	25.9921	327	51	15.5963	623	129	20.7063		1	390	99	25.3846	234	37	15.812	539	119	22.0779
	2	379	103	27.1768	211	23	10.9005	561	134	23.8859		2	343	94	27.4052	183	29	15.847	535	141	26.3551
	3	354	80	22.5989	221	32	14.4796	566	101	17.8445		3	442	98	22.1719	313	32	10.2236	535	109	20.3738
	AVG	412.333	104.667	25.2559	253	35.3333	13.6588	583.333	121.333	20.8122		AVG	391.667	97	24.9873	243.333	32.6667	13.9609	536.333	123	22.9356
	SEM			1.37183			1.41634			1.74481		SEM			1.52373			1.86864			1.77912
	t-test, P value		Het vs KO	0.902082			0.903717			0.442162
E14.5/E18.5	1	385	80	20.7792	216	8	3.7037	569	75	13.181		1	382	72	18.8482	233	22	9.44206	451	80	17.7384
	2	290	61	21.0345	283	18	6.36042	394	63	15.9898		2	447	82	18.3445	257	15	5.83658	672	102	15.1786
	3	226	52	23.0088	295	18	6.10169	364	52	14.2857		3	347	83	23.9193	384	20	5.20833	610	89	14.5902
	AVG	300.333	64.3333	21.6075	264.667	14.6667	5.38861	442.333	63.3333	14.4855		AVG	392	79	20.3707	291.333	19	6.82899	577.667	90.3333	15.8357
	SEM			0.70453			0.845756			0.816971		SEM			1.78027			1.31906			0.966376
	t-test, P value		Het vs KO	0.553467			0.409984			0.346105
E15.5/E18.5	1	561	87	15.508	288	11	3.81944	531	64	12.0527		1	309	52	16.8285	337	16	4.74777	602	66	10.9635
	2	376	73	19.4149	232	7	3.01724	587	89	15.1618		2	441	85	19.2744	395	13	3.29114	479	64	13.3612
	3	370	67	18.1081	237	11	4.64135	558	77	13.7993		3	528	111	21.0227	268	5	1.86567	704	64	9.09091
	AVG	435.667	75.6667	17.677	252.333	9.66667	3.82601	558.667	76.6667	13.6713		AVG	426	82.6667	19.0419	333.333	11.3333	3.30153	595	64.6667	11.1385
	SEM			1.14823			0.468851			0.899801		SEM			1.21634			0.832008			1.23582
	t-test, P value		Het vs KO	0.460325			0.612095			0.172896
E16.5/E18.5	1	463	72	15.5508	300	8	2.66667	553	62	11.2116		1	335	49	14.6269	392	15	3.82653	437	49	11.2128
	2	452	59	13.0531	258	1	0.387597	576	58	10.0694		2	392	58	14.7959	421	11	2.61283	382	52	13.6126
	3	437	62	14.1876	360	9	2.5	514	60	11.6732		3	370	64	17.2973	185	4	2.16216	655	60	9.16031
	AVG	450.667	64.3333	14.2638	306	6	1.85142	547.667	60	10.9847		AVG	365.667	57	15.5734	332.667	10	2.86717	491.333	53.6667	11.3286
	SEM			0.722018			0.733492			0.476643		SEM			0.863349			0.497008			1.28656
	t-test, P value		Het vs KO	0.309286			0.315537			0.814463
