# Supplementary material for: Transcription factor Emx2 controls stereociliary bundle orientation of sensory hair cells
Source: eLife. 2017 Mar 7;6:e23661. doi: 10.7554/eLife.23661 (PMC5388538; doi:10.7554/eLife.23661)
Supplement: Figure 4—source data 1. — DOI: http://dx.doi.org/10.7554/eLife.23661.012 [file elife-23661-fig4-data1.xlsx]

## Sheet: Hair cell density
Quantification of HC density in Emx2 gain-of-function mutants
	Region 1					Region 3
Genotype	Sample #	HC #	Area ( 0.01mm2)	Relative HC density		Sample #	HC #	Area ( 0.01mm2)	Relative HC density
	1	142	1.21982	116.41		1	150	1.30236	115.176
	2	135	1.20113	112.394		2	128	1.2556	101.944
Control	3	141	1.07569	131.078		3	122	1.18541	102.918
	4	198	1.29673	152.691		4	286	1.7653	162.012
	5	130	1.05567	123.145		5	172	1.20111	143.201
	6	136	1.62549	83.6673		6	176	1.84597	95.3428
	AVG	147	1.24576	119.898		AVG	172.333	1.42596	120.099
	SEM			8.48539		SEM		0	10.8817
	1	72	1.12951	63.7443		1	62	1.23757	50.0982
Sox2Cre-12	2	87	1.22012	71.3044		2	53	1.24546	42.5545
(GOF-Early)	3	74	0.756139	97.8656		3	54	0.871387	61.9702
	AVG	77.6667	1.03526	77.6381		AVG	56.3333	1.11814	51.541
	SEM			8.4479		SEM		0	4.61406
	t-test, P value			0.0272859		t-test, P value			0.00407423
	1	105	1.22911	85.4279		1	150	1.45354	103.197
Sox2-15	2	91	1.30738	69.6048		2	112	1.38425	80.9101
(GOF-late)	3	134	1.03707	129.21		3	118	1.09466	107.796
	AVG	110	1.19119	94.7475		AVG	126.667	1.31082	97.3008
	SEM			14.5551		SEM		0	6.77871
	t-test, P value			0.20338		t-test, P value			0.217657
	1	178	1.58021	112.643		1	178	1.7833	99.8152
	2	119	1.08938	109.237		2	149	1.10896	134.36
Gfi1Cre	3	152	1.69271	89.7968		3	198	1.8807	105.28
	4	166	1.7604	94.297		4	120	1.85584	64.6608
	AVG	145.667	1.51416	97.7768		AVG	155.667	1.61517	101.433
	SEM			4.79716		SEM		0	16.5031
	t-test, P value			0.161699		t-test, P value			0.397348
