# Supplementary material for: Transcription factor Emx2 controls stereociliary bundle orientation of sensory hair cells
Source: eLife. 2017 Mar 7;6:e23661. doi: 10.7554/eLife.23661 (PMC5388538; doi:10.7554/eLife.23661)
Supplement: Figure 4—source data 2. — DOI: http://dx.doi.org/10.7554/eLife.23661.013 [file elife-23661-fig4-data2.xlsx]

## Sheet: Apical surface
Quantification of apical surface area of HCs in Emx2 gain-of-function mutants
	Region 1			Region 3
Genotype	Sample #	Apical Surface/HC (um2)		Sample #	Apical Surface/HC (um2)
	1	24.4573		1	22.4347
	2	25.8576		2	28.0703
Control	3	23.6788		3	25.2389
	4	19.1234		4	15.962
	5	18.9087		5	16.056
	6	33.0812		6	26.6413
	AVG	24.1845		AVG	22.4005
	SEM	2.12705		SEM	2.15944
	1	43.704		1	45.1288
Sox2Cre-12	2	41.5628		2	47.1965
(GOF-Early)	3	36.4052		3	38.7111
	AVG	40.5574		AVG	43.6788
	SEM	2.16612		SEM	2.55455
	t-test, P value	0.00199966		t-test, P value	0.000570098
	1	35.5645		1	30.8191
Sox2-15	2	41.0257		2	40.7388
(GOF-late)	3	23.9655		3	23.8247
	AVG	33.5186		AVG	31.7942
	SEM	5.02998		SEM	4.90694
	t-test, P value	0.954991		t-test, P value	0.77153
	1	32.1943		1	33.3753
	2	26.4127		2	20.2027
Gfi1Cre	3	30.8008		3	26.2761
	4	33.7738		4	33.7528
	AVG	30.3291		AVG	26.7439
	SEM	2.13802		SEM	3.91854
	t-test, P value	0.779918		t-test, P value	0.970588
