# Supplementary material for: Transcription factor Emx2 controls stereociliary bundle orientation of sensory hair cells
Source: eLife. 2017 Mar 7;6:e23661. doi: 10.7554/eLife.23661 (PMC5388538; doi:10.7554/eLife.23661)
Supplement: Figure 4—source data 3. — DOI: http://dx.doi.org/10.7554/eLife.23661.014 [file elife-23661-fig4-data3.xlsx]

## Sheet: Hair bundle orientation
Quantification of stereocilia orientation in Emx2 gain-of-function mutants
Region L (angle/hair cell)					Region M (angle/hair cell)
Control	Gfi1Cre (GOF)	Sox2Cre-12 (GOF-early)	Sox2Cre-15 (GOF-late)		Control	Gfi1Cre (GOF)	Sox2Cre-12 (GOF-early)	Sox2Cre-15 (GOF-late)				Region L							Region M
27.35	54.246	128.005	37.349		208.484	30.805	28.389	21.801				Control		Gfi1Cre	Sox2 E12/13	Sox2 E15/16			Control	Gfi1Cre	Sox2 E12/13	Sox2 E15/16
40.601	54.926	124.62	39.359		208.61	37.152	32.471	29.291				L->M	M->L	L->M	L->M	L->M	M->L		M->L	M->L	M->L	L->M	M->L
45	57.653	123.111	41.354		208.61	37.312	38.991	29.745			minimum #	27.35	203.962	54.246	51.667	37.349	210.904		208.484	30.805	28.389	21.801	187.125
45	57.885	118.072	42.809		209.745	38.66	41.917	33.69			quartile 1	67.38	220.914	72.4558	74.358	55.722	216.87		228.935	50.102	52.3543	44.7035	226.029
45	59.789	117.399	45		210.466	41.186	42.936	34.349			median	83.29	229.796	79.591	84.289	65.772	232.334		249.444	57.7875	67.38	56.634	239.775
45.503	59.852	116.775	47.037		210.964	41.82	43.452	35.042			quartile 3	98.746	245.835	90.3032	97.306	77.709	267.274		274.086	66.1565	95.5625	67.032	257.56
45.69	60.255	115.866	47.337		210.964	42.397	44.182	38.1			maximum #	135.306	281.31	144.926	128.005	121.535	279.926		339.624	95.528	148.736	114.969	340.145
46.397	60.255	114.146	48.366		212.471	45	44.187	38.454			AVG	83.596	236.238	81.9026	86.1019	67.4243	240.532		253.351	59.7679	73.9169	56.8637	244.144
47.726	60.255	112.521	48.945		214.509	45	45.131	40.662
47.936	61.803	112.521	49.309		214.695	45	45.579	42.026			One-way ANOVA	significance	summary	**p<0.01	***p<0.001					significance	summary	***p<0.001
49.338	61.858	109.113	51.34		215.218	45.213	46.193	43.069			Con vs Sox2-early	Yes	**						Con vs Sox2-early	Yes	***
50.782	62.494	108.299	51.437		215.538	45.242	46.526	44.519			Con vs Sox2-late	No	ns						Con vs Sox2-late	Yes	***
51.096	63.252	107.073	52.684		216.384	45.403	46.828	44.635			Con vs Gfi1Cre	Yes	***						Con vs Gfi1Cre	Yes	***
54.162	63.82	106.46	53.017		216.87	46.219	47.057	44.772			Sox2-early vs Sox2-late	No	ns						Sox2-early vs Sox2-late	Yes	***
55.008	63.838	106.39	53.13		216.87	46.219	47.161	45.764			Sox2-early vs Gfi1Cre	No	ns						Sox2-early vs Gfi1Cre	No	ns
55.008	65.066	103.736	53.297		218.157	46.343	47.575	47.121			Sox2-late vs Gfi1Cre	No	ns						Sox2-late vs Gfi1Cre	Yes	***
56.104	65.536	103.536	53.561		218.66	46.414	48.327	47.49
56.31	66.591	102.175	53.569		218.66	47.261	48.453	47.726
56.31	66.719	101.889	53.584		218.66	47.48	48.945	48.345
56.889	67.38	101.023	54.256		219.094	47.663	50.906	48.705
57.642	68.039	100.138	54.353		219.472	47.925	51.022	48.945
57.995	68.199	99.712	55.376		219.472	47.955	51.52	49.699
58.392	68.385	99.712	55.722		219.806	48.09	52.312	52.921
59.036	68.776	99.689	56.31		219.806	48.857	52.481	54.462
59.452	69.487	98.973	56.31		220.101	48.945	52.759	55.62
60.018	70.178	98.207	56.904		220.601	49.279	53.13	56.634
60.068	70.288	97.501	57.653		220.914	49.604	53.667	56.952
60.945	70.574	97.306	57.96		221.634	49.671	53.884	58.671
60.945	70.694	96.885	58.671		221.634	49.728	55.612	59.323
61.274	71.565	96.809	59.775		221.82	49.73	58.241	59.5
61.39	72.415	96.546	61.074		221.987	50.102	58.465	59.676
62.103	72.578	96.191	62.021		221.987	50.102	59.216	60.255
62.393	72.624	95.898	62.289		223.264	50.711	59.349	60.945
62.488	72.81	95.453	62.403		225	50.947	60.537	60.945
62.819	72.836	95.29	62.622		225	51.34	61.314	61.368
62.819	72.979	94.764	62.716		225	51.437	63.435	62.12
63.307	73.009	93.945	62.949		225	52.05	63.511	62.319
63.435	73.113	92.726	62.949		225	52.125	64.367	65.659
63.435	73.301	91.886	62.949		225	52.125	65.556	68.405
63.435	73.301	91.465	63.435		225	52.449	65.821	69.624
63.435	73.301	91.239	63.75		225	52.745	65.854	69.634
63.435	73.301	91.019	64.841		225	52.765	65.925	72.699
63.435	73.726	90.688	64.938		225	52.824	65.95	75.964
63.97	73.956	90	65.513		225	53.076	67.38	77.005
64.983	74.291	90	65.772		225	53.076	67.38	77.471
64.983	75.51	89.679	65.854		226.054	53.291	67.38	80.665
65.225	75.603	87.936	66.584		227.49	53.673	70.56	81.511
65.783	75.75	86.82	66.93		227.49	53.861	70.798	81.545
66.038	75.911	86.82	68.962		227.603	54.011	71.779	86.055
66.038	76.914	86.634	70.168		227.726	54.349	77.005	93.18
66.038	77.246	86.634	70.887		227.726	54.866	77.289	114.969
66.801	77.32	85.03	71.996		227.726	54.913	77.821	187.125
67.218	77.386	84.883	73.009		228.013	54.92	78.015	189.273
67.38	77.497	84.289	73.673		228.013	55.008	78.69	206.647
67.834	77.574	84.289	73.74		228.039	55.359	79.291	210.964
67.834	77.702	84.094	74.604		228.366	55.612	80.838	211.109
67.834	77.925	82.635	74.604		228.366	56.07	81.368	213.69
68.199	78.69	82.304	74.932		228.814	56.434	81.384	217.057
68.199	78.69	82.235	75.211		228.814	56.602	81.87	217.355
68.962	79.019	82.152	75.211		228.814	56.911	82.352	218.333
69.444	79.267	81.87	75.75		228.935	57.529	85.684	218.501
69.52	79.915	81.87	76.088		228.935	58.046	87.397	222.207
69.624	81.236	81.416	76.357		229.086	58.046	88.328	222.274
70.436	81.431	81.384	76.544		229.338	58.557	91.258	223.946
71.565	81.911	81.373	76.809		229.399	58.557	91.637	224.215
72.646	81.957	80.362	77.347		229.399	58.671	92.726	224.519
72.646	82.255	80.3	77.709		229.399	58.923	95.117	226.029
72.897	82.273	80.218	77.905		229.399	59.036	95.711	226.606
72.897	82.737	80.087	78.778		230.194	59.207	97.125	226.909
72.897	82.904	79.909	78.941		230.528	59.908	97.607	227.332
72.897	83.418	79.291	79.053		230.711	60.255	97.921	227.925
72.897	83.92	78.69	79.54		230.711	60.255	98.13	228.066
73.072	84.218	76.931	79.935		230.782	60.422	98.81	229.164
73.301	84.56	76.535	82.444		230.782	60.832	98.973	230.143
73.61	84.611	75.964	82.807		231.34	60.897	100.934	231.009
73.74	84.611	75.805	83.497		231.34	61.169	101.023	231.721
74.055	85.781	75.805	83.66		232.125	62.253	103.241	235.164
74.208	85.845	75.7	83.991		232.125	62.953	104.434	236.31
74.745	86.138	75.677	84.401		232.125	63.435	104.583	236.986
75.069	86.541	75.145	84.92		232.125	63.566	105.524	237.421
75.5	86.807	74.505	85.236		232.431	64.116	107.038	238.725
75.964	86.82	74.358	85.352		232.815	64.518	107.543	239.775
75.964	87.337	74.32	85.426		233.13	64.654	110.41	239.959
76.891	87.879	74.32	86.455		233.13	65.09	111.65	240.499
77.005	87.879	74.219	86.455		233.13	65.165	115.145	242.987
77.005	88.044	73.909	87.397		233.13	65.225	117.897	245.251
77.005	89.215	73.091	92.337		234.162	65.225	118.393	247.094
77.471	89.246	72.897	101.73		234.462	65.472	118.61	247.548
77.709	90	72.575	121.535		234.782	65.706	130.601	249.829
77.905	90	72.575	210.904		235.305	65.925	148.736	250.168
77.905	90.214	71.966	211.759		236.31	66.098		251.565
77.905	90.333	71.2	212.341		236.31	66.176		253.824
77.935	90.757	69.821	216.87		237.529	66.801		254.422
79.38	90.879	69.444	226.909		237.995	70.121		254.638
79.38	91.364	68.515	230.947		238.241	70.56		255.75
79.992	92.161	67.814	232.334		238.465	71.701		255.835
80.022	92.595	67.671	234.593		239.036	73.009		257.56
80.538	93.056	66.669	257.471		239.036	73.009		260.272
80.538	93.646	65.821	267.274		239.452	73.301		260.538
80.538	93.945	63.435	270.947		240.327	73.389		260.66
80.538	94.038	63.435	274.635		240.945	73.496		261.158
80.727	94.367	60.945	279.926		240.945	74.745		261.656
80.727	95.681	56.31			241.39	74.991		262.875
82.112	95.681	55.078			241.639	75.225		263.884
82.405	95.823	54.345			241.699	75.303		267.955
82.405	96.096	53.344			241.952	75.475		272.564
83.29	98.344	53.159			243.435	75.964		290.772
84.094	98.988	52.164			243.435	76.088		297.784
84.207	100.482	51.667			244.25	76.481		299.578
84.472	100.923				244.537	76.675		300.677
85.601	103.363				245.225	76.954		328.861
85.601	104.845				245.556	78.69		340.145
85.601	105.255				245.556	79.641
85.914	106.991				245.556	81.066
86.021	107.103				246.038	82.273
86.186	107.488				246.038	82.737
86.186	108.435				246.038	83.418
86.186	111.473				246.038	85.601
86.583	113.199				246.038	86.269
86.634	126.643				246.888	90.431
86.82	128.326				247.38	95.528
86.987	144.926				247.62	95.528
87.739					248.385
87.852					249.444
88.059					249.775
90					250.017
90					250.017
90					250.017
90					250.346
90					250.436
90					250.956
90					251.2
90.642					251.565
91.909					251.565
92.337					252.013
92.603					252.181
92.603					252.897
93.013					253.301
93.066					254.055
93.18					254.208
93.532					254.745
93.814					255.018
93.945					255.5
94.086					255.5
94.086					255.964
94.399					256.329
94.399					256.329
94.399					256.759
94.648					257.005
95.618					257.905
96.34					258.147
97.001					259.38
97.001					259.509
97.125					260.074
97.765					260.621
97.846					261.027
98.13					261.193
98.584					261.87
98.746					261.957
98.746					262.349
98.746					263.48
99.462					263.558
99.462					264.094
99.462					264.094
99.525					264.289
100.008					265.236
100.408					265.601
101.889					265.601
102.095					265.815
102.529					266.186
102.817					266.186
103.046					266.186
103.241					267.51
104.036					267.51
104.47					267.955
105.001					268.059
105.255					270
105.368					270
105.945					270
106.26					270.213
106.928					270.579
107.103					270.855
107.103					271.488
107.103					273.066
107.354					273.318
108.435					274.086
108.435					274.399
108.699					274.764
109.654					275.092
109.737					275.618
109.855					275.782
111.038					276.009
111.038					276.86
111.991					276.911
112.38					277.001
112.38					277.672
113.199					277.775
114.444					279.462
115.346					279.462
116.261					279.593
116.565					280.085
116.565					280.176
118.301					280.305
119.055					280.596
119.055					280.923
119.291					281.31
121.464					282.529
123.408					283.081
124.509					284.036
125.538					285.068
125.538					285.709
132.397					286.074
135.306					286.074
203.962					286.22
209.358					287.571
212.276					287.819
216.254					288.435
216.87					292.218
217.569					292.834
219.094					293.552
220.914					294.444
220.914					298.237
222.51					298.474
225					298.61
226.736					298.673
228.366					300.964
228.814					300.964
229.399					301.891
230.194					302.872
231.34					303.254
233.746					303.69
239.036					303.69
241.39					303.69
244.983					306.158
245.225					306.87
246.038					309.289
248.199					310.601
256.945					310.972
266.634					311.634
270					311.934
274.399					319.399
279.656					319.439
281.31					325.739
					326.674
					327.529
					331.22
					334.075
					339.624
