# Supplementary material for: Transcription factor Emx2 controls stereociliary bundle orientation of sensory hair cells
Source: eLife. 2017 Mar 7;6:e23661. doi: 10.7554/eLife.23661 (PMC5388538; doi:10.7554/eLife.23661)
Supplement: Figure 7—source data 1. — DOI: http://dx.doi.org/10.7554/eLife.23661.020 [file elife-23661-fig7-data1.xlsx]

## Sheet: Sheet1
	Quantification of stereocilia orientation in Ptx mutants
	Utricle		Region L							Region M
	Genotype	Sample#	Total HC #	Misorientated HC#	Reversed HC #	% Mis HCs	% Rev HCs	% Affected HCs		Total HC #	Misorientated HC#	Reversed HC #	% Mis HCs	% Rev HCs	% Affected HCs
	Control	1	62	0	0	0	0	0		74	0	0	0	0	0
		2	54	0	0	0	0	0		59	0	0	0	0	0
		3	57	0	0	0	0	0		74	0	0	0	0	0
					AVG	0	0	0				AVG	0	0	0
					SEM	0	0	0				SEM	0	0	0
	Foxg1 Cre/+;Rosa Ptx/+	1	57	1	6	1.75439	10.5263	12.2807		63	0	0	0	0	0
		2	73	3	7	4.10959	9.58904	13.6986		80	0	0	0	0	0
		3	64	2	10	3.125	15.625	18.75		73	0	0	0	0	0
					AVG	2.99633	11.9135	14.9098				AVG	0	0	0
					SEM	0.682926	1.87539	2.55832				SEM	0.682926	1.87539	2.55832
				t-test, P value			Ptx vs Con	0.00161276
	Saccule		Region IR							Region OR
	Genotype	Sample#	Total HC #	Misorientated HC#	Reversed HC #	% Mis HCs	% Rev HCs	% Affected HCs		Total HC #	Misorientated HC#	Reversed HC #	% Mis HCs	% Rev HCs	% Affected HCs
	Control	1	62	0	0	0	0	0		55	0	0	0	0	0
		2	62	0	0	0	0	0		66	0	0	0	0	0
		3	64	0	0	0	0	0		60	0	0	0	0	0
					AVG	0	0	0				AVG	0	0	0
					SEM	0	0	0				SEM	0	0	0
	Foxg1 Cre/+;Rosa Ptx/+	1	75	5	32	6.66667	42.6667	49.3333		64	0	0	0	0	0
		2	64	5	23	7.8125	35.9375	43.75		64	0	0	0	0	0
		3	71	2	30	2.8169	42.2535	45.0704		70	0	0	0	0	0
					AVG	5.76536	40.2859	46.0513				AVG	0	0	0
					SEM	1.51088	2.17747	3.68835				SEM	0.682926	1.87539	2.55832
				t-test, P value			Ptx vs Con	1.06522e-05
