# Supplementary material for: Transcription factor Emx2 controls stereociliary bundle orientation of sensory hair cells
Source: eLife. 2017 Mar 7;6:e23661. doi: 10.7554/eLife.23661 (PMC5388538; doi:10.7554/eLife.23661)
Supplement: Figure 8—source data 1. — DOI: http://dx.doi.org/10.7554/eLife.23661.022 [file elife-23661-fig8-data1.xlsx]

## Sheet: Sheet1
	Quantification of stereocilia orientation in utricles of Ptx single and Ptx and Emx2 compound mutants
			Region L							Region M
	Genotype	Sample#	Total HC #	Misorientated HC#	Reversed HC #	% Mis HCs	% Rev HCs	% Affected HCs		Total HC #	Misorientated HC#	Reversed HC #	% Mis HCs	% Rev HCs	% Affected HCs
	Control	1	62	0	0	0	0	0		74	0	0	0	0	0
		2	54	0	0	0	0	0		59	0	0	0	0	0
		3	57	0	0	0	0	0		74	0	0	0	0	0
					AVG	0	0	0				AVG	0	0	0
					SEM	0	0	0				SEM	0	0	0
	Gfi1Cre/+;RosaPtx/+	1	51	2	2	3.92157	3.92157	7.84314		54	0	0	0	0	0
		2	49	2	1	4.08163	2.04082	6.12245		59	0	0	0	0	0
		3	50	2	1	4	2	6		59	0	0	0	0	0
					AVG	4.00107	2.65413	6.6552				AVG	0	0	0
					SEM	0.682926	1.87539	2.55832				SEM	0.682926	1.87539	2.55832
					t-test, P value		Ptx vs Con	0.000363783				t-test, P value		Ptx vs Con	ns
	Gfi1Cre/+;RosaEmx2/+	1	67	0	0	0	0	0		57	0	57	0	100	100
		2	57	0	0	0	0	0		52	0	51	0	98.0769	98.0769
		3	53	0	0	0	0	0		55	0	55	0	100	100
					AVG	0	0	0				AVG	0	99.359	99.359
					SEM	0	0	0				SEM	0	1.11029	1.11029
	Gfi1Cre/+;RosaPtx/Emx2	1	63	2	2	3.1746	3.1746	6.34921		50	4	43	8	86	94
		2	47	3	2	6.38298	4.25532	10.6383		60	9	47	15	78.3333	93.3333
		3	59	4	3	6.77966	5.08475	11.8644		54	6	42	11.1111	77.7778	88.8889
					AVG	5.44575	4.17156	9.6173				AVG	11.3704	80.7037	92.0741
					SEM	0.682926	1.87539	2.55832				SEM	0.682926	1.87539	2.55832
					t-test, P value	Emx2+Ptx vs Emx2		0.00452919				t-test, P value	Emx2+Ptx vs Emx2		0.0135102
						Emx2+Ptx vs Ptx		0.17042
			Region L							Region M
			One-way ANOVA		significance	Summary	**p<0.01					significance	Summary	**p<0.01
			Con vs Ptx		Yes	**				Con vs Ptx		No	ns
			Con vs Emx2		No	ns				Con vs Emx2		Yes	***
			Con vs Emx2+Ptx		Yes	**				Con vs Emx2+Ptx		Yes	***
			Ptx vs Emx2		Yes	**				Ptx vs Emx2		Yes	***
			Ptx vs Emx2+Ptx		No	ns				Ptx vs Emx2+Ptx		Yes	***
			Emx2 vs Emx2+Ptx		Yes	**				Emx2 vs Emx2+Ptx		Yes	**
