# Supplementary material for: Transcription factor Emx2 controls stereociliary bundle orientation of sensory hair cells
Source: eLife. 2017 Mar 7;6:e23661. doi: 10.7554/eLife.23661 (PMC5388538; doi:10.7554/eLife.23661)
Supplement: Figure 10—source data 1. — DOI: http://dx.doi.org/10.7554/eLife.23661.025 [file elife-23661-fig10-data1.xlsx]

## Sheet: Hair bundle orientaition
	Quantification of stereocilia orientation in neuromasts of emx2 gain and loss of function mutants
		Wildtype
	Anterior-Posterior oriented neuromasts											Dorsal-Ventral orientated neuromasts
	Fish #	Total HC# per neuromast	HC# A->P	HC# P->A	Emx2 +ve HC# (A->P)	Emx2 +ve HC# (P->A)	% HC A->P	% HC P->A	% Emx2 +ve HC (A->P)	% Emx2 +ve HC (P->A)		Fish #	Total HC# per neuromast	HC# D->V	HC# V->D	Emx2 +ve HC# (D->V)	Emx2 +ve HC# (V->D)	% HC D->V	% HC V->D	% Emx2 +ve HC (D->V)	% Emx2 +ve HC (V->D)
	1	8	4	4	4	0	50	50	100	0		1	2	1	1	1	0	50	50	100	0
	2	8	4	4	4	0	50	50	100	0		2	16	8	8	8	0	50	50	100	0
	3	4	2	2	2	0	50	50	100	0		3	10	4	6	4	0	40	60	100	0
	4	4	2	2	2	0	50	50	100	0		3	14	7	7	7	0	50	50	100	0
	5	14	7	7	7	0	50	50	100	0		4	10	5	5	5	0	50	50	100	0
	6	16	8	8	8	0	50	50	100	0		6	4	2	2	2	0	50	50	100	0
	3	11	5	6	5	0	45.4545	54.5455	100	0		7	4	2	2	2	0	50	50	100	0
	2	4	2	2	2	0	50	50	100	0		8	10	4	6	4	0	40	60	100	0
	4	6	3	3	3	0	50	50	100	0		9	10	5	5	5	0	50	50	100	0
	7	15	7	8	7	0	46.6667	53.3333	100	0		10	12	6	6	6	0	50	50	100	0
	8	2	1	1	1	0	50	50	100	0		12	8	4	4	4	0	50	50	100	0
	9	18	9	9	9	0	50	50	100	0		13	10	4	6	4	0	40	60	100	0
	11	12	6	6	6	0	50	50	100	0		16	8	4	4	4	0	50	50	100	0
	12	17	8	9	8	0	47.0588	52.9412	100	0		5	8	4	4	4	0	50	50	100	0
	15	14	7	7	7	0	50	50	100	0		7	14	7	7	7	0	50	50	100	0
	13	14	7	7	7	0	50	50	100	0		15	8	4	4	4	0	50	50	100	0
	14	10	5	5	5	0	50	50	100	0		16	4	2	2	2	0	50	50	100	0
	17	20	10	10	10	0	50	50	100	0		19	14	7	7	7	0	50	50	100	0
	18	4	2	2	2	0	50	50	100	0		10	8	4	4	4	0	50	50	100	0
	10	16	9	7	9	0	56.25	43.75	100	0		20	8	4	4	4	0	50	50	100	0
	21	18	9	9	9	0	50	50	100	0		20	10	6	4	6	0	60	40	100	0
	22	14	7	7	7	0	50	50	100	0		22	8	4	4	4	0	50	50	100	0
	23	16	8	8	8	0	50	50	100	0		23	12	6	6	6	0	50	50	100	0
	24	14	8	6	8	0	57.1429	42.8571	100	0		24	15	7	8	7	0	46.6667	53.3333	100	0
	14	12	6	6	6	0	50	50	100	0		25	10	5	5	5	0	50	50	100	0
	15	8	4	4	4	0	50	50	100	0		26	4	2	2	2	0	50	50	100	0
	26	19	10	9	10	0	52.6316	47.3684	100	0		SUM	241	118	123	118	118
	23	17	9	8	9	0	52.9412	47.0588	100	0		AVG						49.1026	50.8974	100	100
	12	18	9	9	9	0	50	50	100	0		SEM						0.774766	0.774766	1.11479e-15	1.11479e-15
	SUM	353	178	175	178	178						t-test, P value					D->V vs V->D		0.107674	Emx2 +ve HC (D->V vs V->D)	0
	AVG						50.2809	49.7191	100	100
	SEM						0.420815	0.420815	1.11513e-15	1.11513e-15
	t-test, P value					A->P vs P->A		0.349248	Emx2 +ve HC (A->P vs P->A)	0
		emx2 LOF
	Anterior-Posterior oriented neuromasts											Dorsal-Ventral orientated neuromasts
	Fish #	Total HC# per neuromast	HC# A->P	HC# P->A	Emx2 +ve HC# (A->P)	Emx2 +ve HC# (P->A)	% HC A->P	% HC P->A	% Emx2 +ve HC (A->P)	% Emx2 +ve HC (P->A)		Fish #	Total HC# per neuromast	HC# D->V	HC# V->D	Emx2 +ve HC# (D->V)	Emx2 +ve HC# (V->D)	% HC D->V	% HC V->D	% Emx2 +ve HC (D->V)	% Emx2 +ve HC (V->D)
	1	21	0	21	0	0	0	100	0	0		1	19	0	19	0	0	0	100	0	0
	1	24	0	24	0	0	0	100	0	0		2	14	0	14	0	0	0	100	0	0
	3	18	0	18	0	0	0	100	0	0		2	9	0	9	0	0	0	100	0	0
	4	19	0	19	0	0	0	100	0	0		3	6	0	6	0	0	0	100	0	0
	5	9	0	9	0	0	0	100	0	0		4	21	0	21	0	0	0	100	0	0
	6	15	0	15	0	0	0	100	0	0		5	12	0	12	0	0	0	100	0	0
	7	20	0	20	0	0	0	100	0	0		6	21	0	21	0	0	0	100	0	0
	8	23	0	23	0	0	0	100	0	0		7	24	0	24	0	0	0	100	0	0
	9	22	0	22	0	0	0	100	0	0		8	15	0	15	0	0	0	100	0	0
	10	16	0	16	0	0	0	100	0	0		9	12	0	12	0	0	0	100	0	0
	11	20	0	20	0	0	0	100	0	0		10	12	0	12	0	0	0	100	0	0
	12	18	0	18	0	0	0	100	0	0		11	26	0	26	0	0	0	100	0	0
	13	22	0	22	0	0	0	100	0	0		12	27	0	27	0	0	0	100	0	0
	14	21	0	21	0	0	0	100	0	0		13	15	0	15	0	0	0	100	0	0
	15	21	0	21	0	0	0	100	0	0		14	8	0	8	0	0	0	100	0	0
	16	20	0	20	0	0	0	100	0	0		15	16	0	16	0	0	0	100	0	0
	SUM	309	0	309	0	0						16	14	0	14	0	0	0	100	0	0
	AVG						0	100	0	0		16	26	0	26	0	0	0	100	0	0
	SEM						0	0	0	0		17	18	0	18	0	0	0	100	0	0
	t-test, P value					A->P vs P->A		0				18	10	0	10	0	0	0	100	0	0
												SUM	325	0	325	0	0
												AVG						0	100	0	0
												SEM						0	0	0	0
												t-test, P value					D->V vs V->D		0
		emx2 GOF
	Anterior-Posterior oriented neuromasts											Dorsal-Ventral orientated neuromasts
	Fish #	Total HC# per neuromast	HC# A->P	HC# P->A	Emx2 +ve HC# (A->P)	Emx2 +ve HC# (P->A)	% HC A->P	% HC P->A	% Emx2 +ve HC (A->P)	% Emx2 +ve HC (P->A)		Fish #	Total HC# per neuromast	HC# D->V	HC# V->D	Emx2 +ve HC# (D->V)	Emx2 +ve HC# (V->D)	% HC D->V	% HC V->D	% Emx2 +ve HC (D->V)	% Emx2 +ve HC (V->D)
	1	12	12	0	12	0	100	0	100	0		16	10	10	0	6	0	100	0	100	0
	5	4	4	0	4	0	100	0	100	0		17	6	6	0	9	0	100	0	100	0
	6	2	2	0	2	0	100	0	100	0		18	9	9	0	11	0	100	0	100	0
	7	4	4	0	4	0	100	0	100	0		19	11	11	0	16	0	100	0	100	0
	7	3	3	0	3	0	100	0	100	0		19	16	16	0	14	0	100	0	100	100
	8	6	6	0	6	0	100	0	100	0		19	12	12	0	14	0	100	0	100	0
	9	8	8	0	8	0	100	0	100	0		20	14	14	0	10	0	100	0	100	100
	9	14	14	0	14	0	100	0	100	0		21	8	8	0	14	0	100	0	100	100
	9	9	9	0	9	0	100	0	100	0		21	14	14	0	15	0	100	0	100	100
	9	7	7	0	7	0	100	0	100	0		21	14	14	0	10	0	100	0	100	100
	9	6	6	0	6	0	100	0	100	0		22	8	8	0	9	0	100	0	100	100
	10	10	10	0	10	0	100	0	100	0		22	8	8	0	14	0	100	0	100	100
	10	10	10	0	10	0	100	0	100	0		22	14	14	0	8	0	100	0	100	100
	11	12	12	0	12	0	100	0	100	0		23	8	6	2	8	0	75	25	100	100
	11	13	13	0	13	0	100	0	100	0		SUM	152	150	2	158	0
	11	8	8	0	8	0	100	0	100	0		AVG						98.2143	1.78571	100	64.2857
	11	8	8	0	8	0	100	0	100	0		SEM						1.78571	1.78571	1.05338e-15	13.2894
	12	11	11	0	11	0	100	0	100	0		t-test, P value					D->V vs V->D		2.29009e-24
	12	12	12	0	12	0	100	0	100	0
	12	17	17	0	17	0	100	0	100	0
	12	14	14	0	14	0	100	0	100	0
	12	12	12	0	12	0	100	0	100	0
	13	9	9	0	9	0	100	0	100	0
	13	14	14	0	14	0	100	0	100	0
	14	8	8	0	8	0	100	0	100	0
	14	7	7	0	7	0	100	0	100	0
	14	11	11	0	11	0	100	0	100	0
	15	9	7	2	7	0	77.7778	22.2222	100	100
	15	13	9	4	9	0	69.2308	30.7692	100	100
	SUM	273	267	6	267	0
	AVG						98.1727	1.82729	100	6.89655
	SEM						1.70534	1.70534	1.36272e-15	6.3427
	t-test, P value					A->P vs P->A		1.57935e-49
