# Supplementary material for: Transcription factor Emx2 controls stereociliary bundle orientation of sensory hair cells
Source: eLife. 2017 Mar 7;6:e23661. doi: 10.7554/eLife.23661 (PMC5388538; doi:10.7554/eLife.23661)
Supplement: Figure 10—source data 2. — DOI: http://dx.doi.org/10.7554/eLife.23661.026 [file elife-23661-fig10-data2.xlsx]

## Sheet: Ca2+ imaging
	Quantification of calcium-activated HCs with oriented stimuli in emx2 gain of function neuromasts
		Control group				Emx2 GOF group
	Neuromast #	A->P %	P->A %		Neuromast #	A->P %	P->A %
	1	33.33	66.66		1	100	0
	2	50	50		2	100	0
	3	50	50		3	100	0
	4	57.14	42.86		4	100	0
	AVG	47.6175	52.38		5	100	0
	SEM	5.0511	5.04874		6	100	0
					7	100	0
					AVG	100	0
					SEM	0	0
	Results represent quantification from two independent experiments
